# Supplementary material for: The effect of built-in and portable ionizers on in-cabin ozone concentrations in light-duty vehicles
Source: Royal Society of Chemistry journal article supplement (doi:10.1039/d2em00129b), 2022-01-01
Supplement: d2em00129b1.pdf [file d2em00129b1.pdf]

### Supplementary information figures:

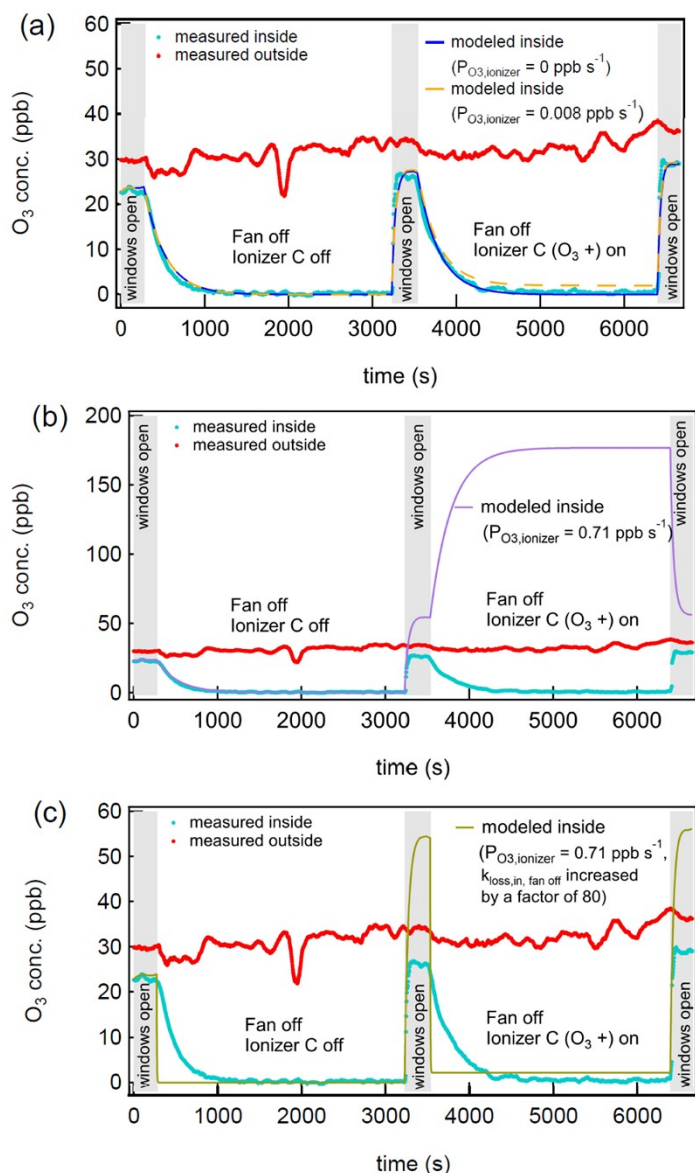

**Figure S1:** Measurements (markers) and modeled (lines) of inside (blue and other colors) and outside (red) O<sub>3</sub> concentrations for a single fan off test for ionizer C in O<sub>3</sub>+ mode. The model assumes an ozone production rate from the ionizer of (a) 0 ppb s<sup>-1</sup> (blue line), 0.008 ppb s<sup>-1</sup> (orange dashed line), (b) 0.71 ppb s<sup>-1</sup> (purple line) and (c) 0.71 ppb s<sup>-1</sup> (brown line). In panel (c) the first order O<sub>3</sub> loss rate with the fans off in the model is increased by a factor of 80 to 0.32 s<sup>-1</sup>. Ionizers are turned on when the windows are opened in the middle of the experiments. Grey shaded areas are times when the windows were open. Note that a non-zero offset of 3.75 ppb which is assumed to stay constant over time and is due to either a calibration issue or an interference from high concentrations of VOCs has been subtracted from inside measured O<sub>3</sub> concentrations.
